# Supplementary material for: Diruthenium(II,III) tetramidates as a new class of oxygenation catalysts
Source: Royal Society of Chemistry journal article supplement (doi:10.1039/c1dt11530h), 2011-11-04
Supplement: c1dt11530h.pdf [file c1dt11530h.pdf]

## Electronic Supplementary Information

For “Diruthenium(II,III) tetramidates as a new class of oxygenation catalysts”

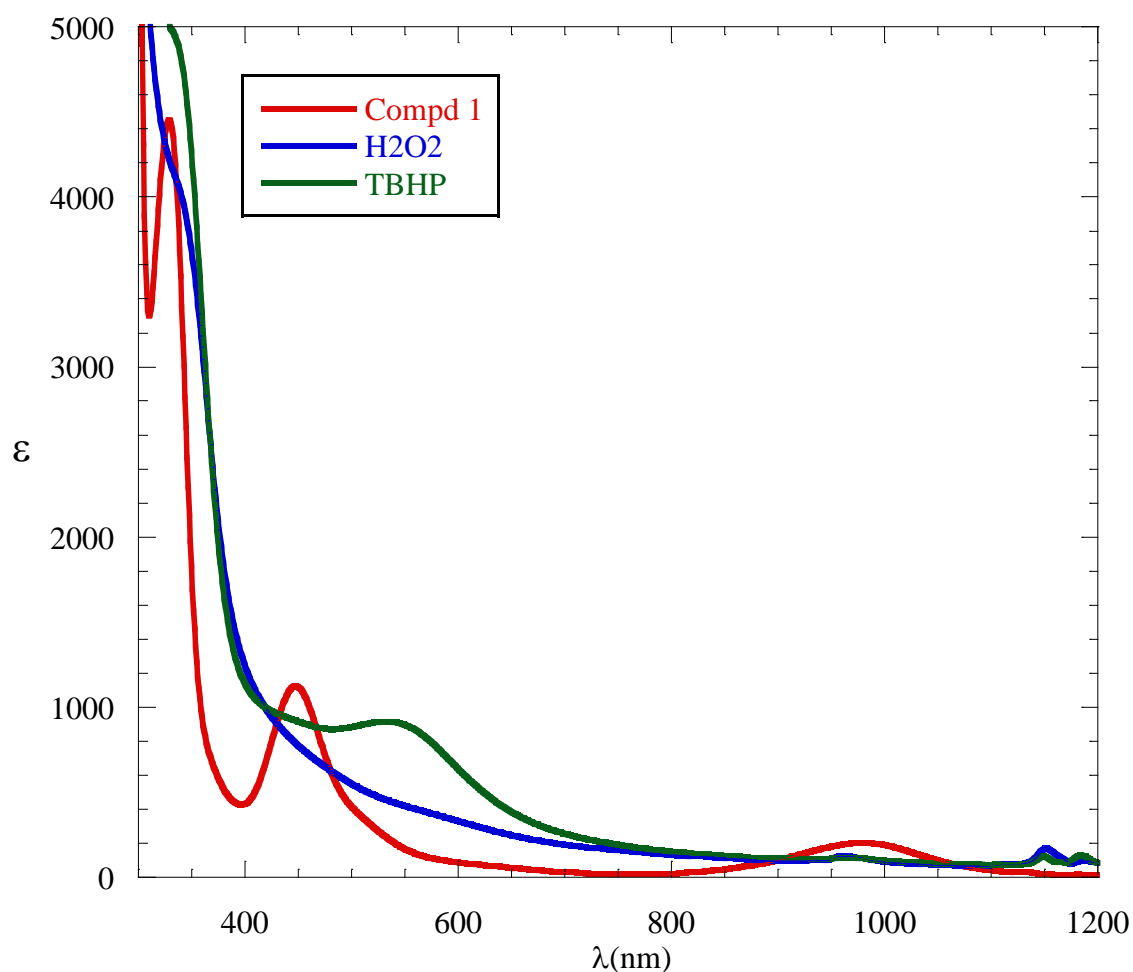

Figure S1. Vis-NIR spectra of compound **1** and its degradation products recorded in CH<sub>3</sub>CN. The “H<sub>2</sub>O<sub>2</sub>” and “TBHP” spectra were recorded after **1** was reacted with 8 equiv of H<sub>2</sub>O<sub>2</sub> and TBHP in CH<sub>3</sub>CN 24 h, respectively.

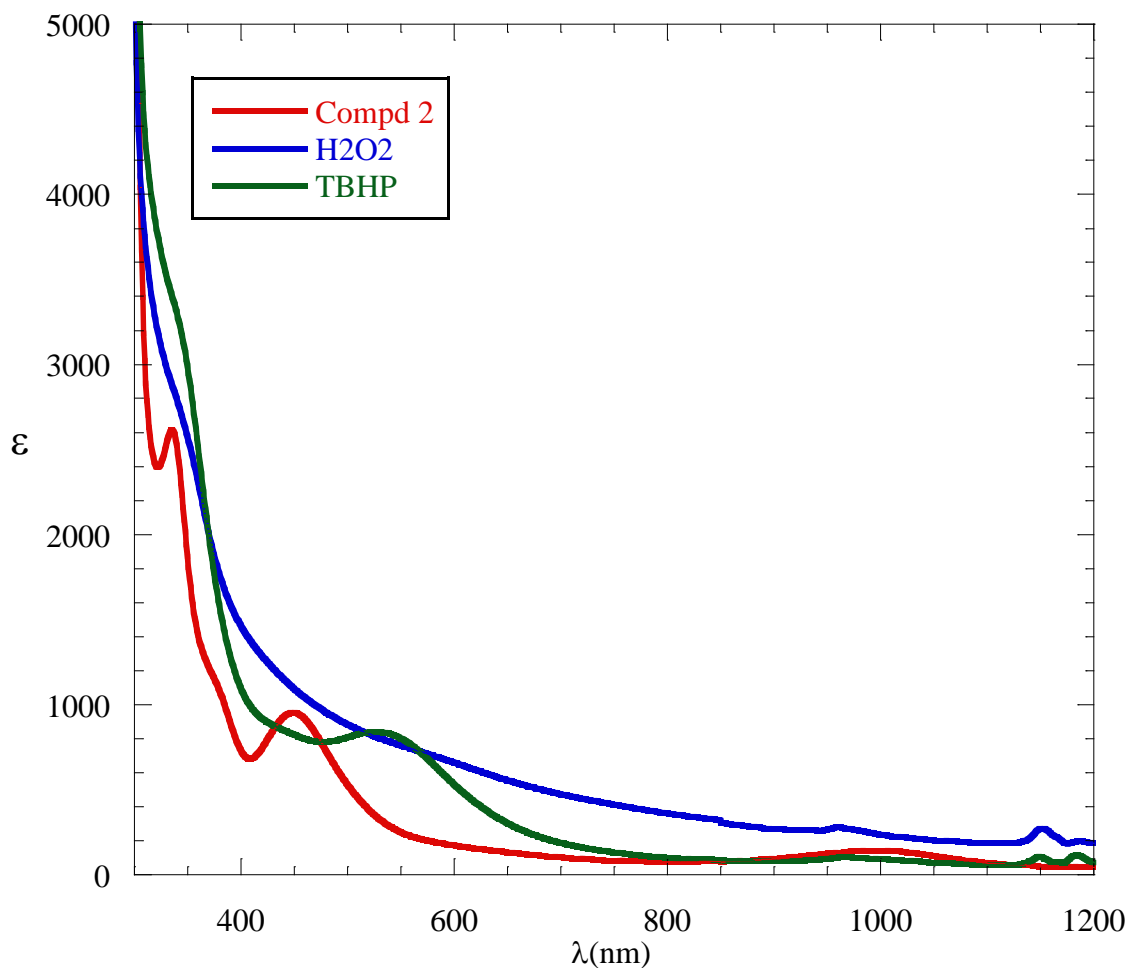

Figure S2. Vis-NIR spectra of compound **2** and its degradation products recorded in  $\text{CH}_3\text{CN}$ . The “ $\text{H}_2\text{O}_2$ ” and “TBHP” spectra were recorded after **2** was reacted with 8 equiv of  $\text{H}_2\text{O}_2$  and TBHP in  $\text{CH}_3\text{CN}$  for 24 h, respectively.

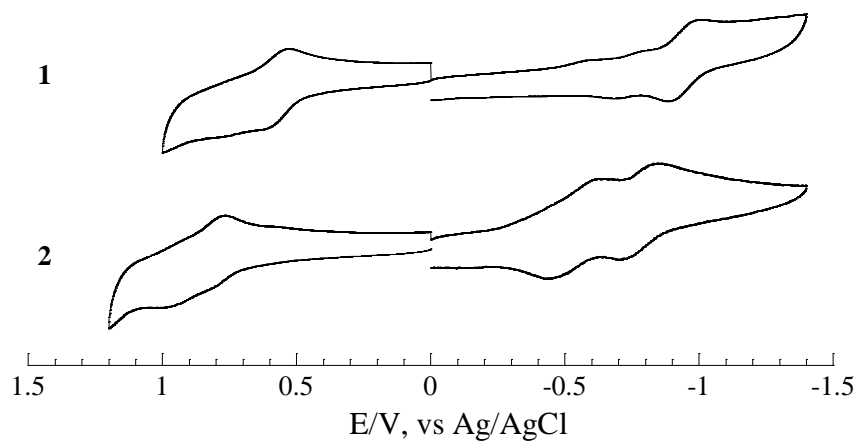

Figure S3. Cyclic voltammograms of compounds **1** and **2** recorded in  $\text{CH}_3\text{CN}$ .

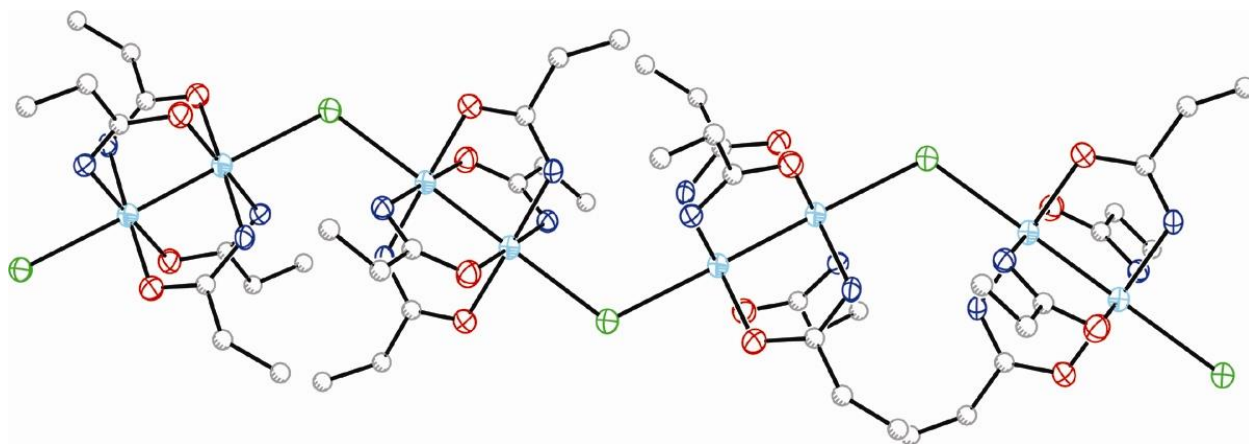

Figure S4. The chain structure of compound 2.

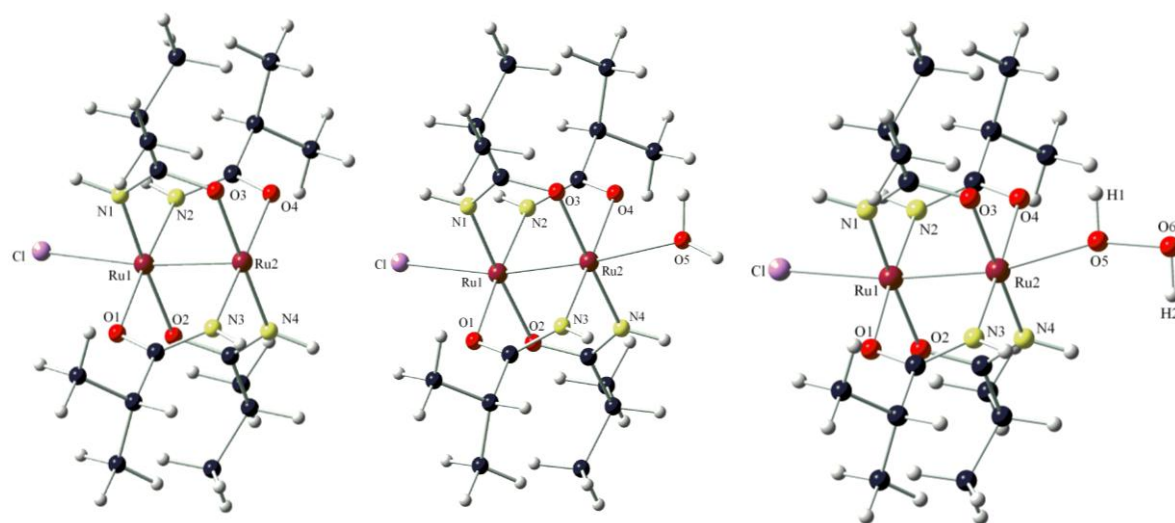

Figure S5. The optimized structures of **1'** (left), **1'•H<sub>2</sub>O** and **1'•H<sub>2</sub>O<sub>2</sub>** (right).

**Table S1.** Optimized Bond Lengths (Å) and Angles (deg) Computed for **1'**, **1'•H<sub>2</sub>O** and **1'•H<sub>2</sub>O<sub>2</sub>**

|            | <b>1'</b> | <b>1'•H<sub>2</sub>O</b> | <b>1'•H<sub>2</sub>O<sub>2</sub></b> |
|------------|-----------|--------------------------|--------------------------------------|
| Ru1-Ru2    | 2.355     | 2.375                    | 2.388                                |
| Ru1-Cl     | 2.483     | 2.525                    | 2.494                                |
| Ru1-N1     | 2.049     | 2.039                    | 2.037                                |
| Ru1-N2     | 2.049     | 2.039                    | 2.037                                |
| Ru1-O1     | 2.093     | 2.090                    | 2.089                                |
| Ru1-O2     | 2.093     | 2.090                    | 2.089                                |
| Ru2-N3     | 2.049     | 2.039                    | 2.037                                |
| Ru2-N4     | 2.049     | 2.039                    | 2.037                                |
| Ru2-O3     | 2.066     | 2.088                    | 2.089                                |
| Ru2-O4     | 2.066     | 2.088                    | 2.089                                |
| Ru2-O5     |           | 2.448                    | 2.314                                |
| O5-O6      |           |                          | 1.618                                |
| Ru2-Ru1-Cl | 172.5     | 170.3                    | 172.2                                |
| Ru2-Ru1-O5 |           | 174.5                    | 168.4                                |
| Ru2-O5-O6  |           |                          | 160.7                                |
| Ru2-Ru1-N1 | 86.9      | 86.5                     | 87.1                                 |
| Ru2-Ru1-N2 | 86.9      | 86.5                     | 87.1                                 |
| Ru2-Ru1-O1 | 89.6      | 90.3                     | 89.7                                 |
| Ru2-Ru1-O2 | 89.6      | 90.3                     | 89.7                                 |
| Ru1-Ru2-N3 | 88.6      | 87.9                     | 88.2                                 |
| Ru1-Ru2-N4 | 88.6      | 87.9                     | 88.2                                 |
| Ru1-Ru2-O3 | 91.2      | 91.6                     | 90.7                                 |
| Ru1-Ru2-O4 | 91.2      | 91.6                     | 90.7                                 |
